# Supplementary material
Source: PubMed Central journal article supplement (PMC3524150)
Supplement: viru-3-510-s01.pdf [file viru-3-510-s01.pdf]

## **Supplemental Material to:**

**John J. Varga, Adam Vigil, David DeShazer, David M. Waag,  
Philip Felgner and Joanna B. Goldberg**

**Distinct human antibody response to the biological  
warfare agent *Burkholderia mallei***

**Virulence 2012; 3 (6)**

**<http://dx.doi.org/10.4161/viru.22056>**

**<http://www.landesbioscience.com/journals/virulence/article/22056/>**

**Supplemental Table 1. Complete results of the human glanders serum analysis**

| Bp locus    | Bm locus* | Log <sub>2</sub> (post-exposure/pre-exposure) | Product Name                                                   | DNA in Bm ATCC 23344 | Protein present in <i>B. mallei</i> * | Pre-bleed signal intensity | 64 day signal intensity | Comment¶                                                                                                           |
|-------------|-----------|-----------------------------------------------|----------------------------------------------------------------|----------------------|---------------------------------------|----------------------------|-------------------------|--------------------------------------------------------------------------------------------------------------------|
| BPSL0007    | BMA2786   | 0.75                                          | general secretory pathway protein D                            | yes                  | yes                                   | 1268                       | 2134                    |                                                                                                                    |
| BPSL0014    | BMA2778   | 0.03                                          | general secretory pathway protein J                            | yes                  | yes                                   | 2163                       | 2205                    |                                                                                                                    |
| BPSL0041-m1 | BMA2675   | -1.26                                         | outer membrane porin lipoprotein precursor                     | yes                  | yes                                   | 6250                       | 2603                    |                                                                                                                    |
| BPSL0093-m2 | NA        | 0.57                                          | putative lipoprotein                                           | no                   | no                                    | 1140                       | 1694                    |                                                                                                                    |
| BPSL0262-m1 | BMA3314   | -0.13                                         | putative transglycosylase                                      | yes                  | yes                                   | 2213                       | 2019                    |                                                                                                                    |
| BPSL0280-m1 | BMA3335   | -0.24                                         | FlgK                                                           | yes                  | yes                                   | 2098                       | 1775                    | <i>B. mallei</i> is aflagellar                                                                                     |
| BPSL0280-m2 | BMA3335   | 0.43                                          | FlgK                                                           | yes                  | yes                                   | 1472                       | 1984                    | <i>B. mallei</i> is aflagellar                                                                                     |
| BPSL0326    | PNC       | 0.53                                          | putative outer membrane porin protein precursor                | yes                  | PNC                                   | 1284                       | 1859                    | gene present in <i>B. pseudomallei</i> K96243 and 99% identical sequence in <i>B. mallei</i> ATCC 23344 not called |
| BPSL0360-m1 | BMA0105   | -1.13                                         | putative alkaline phosphatase                                  | yes                  | partial                               | 6107                       | 2785                    | gene called in <i>B. mallei</i> SAVP1 but not <i>B. mallei</i> ATCC23344                                           |
| BPSL0361    | BMA0106   | 0.12                                          | putative alkaline phosphatase                                  | yes                  | yes                                   | 7913                       | 8628                    |                                                                                                                    |
| BPSL0606    | BMA0030   | 0.2                                           | acyltransferase                                                | yes                  | yes                                   | 1494                       | 1716                    |                                                                                                                    |
| BPSL0665    | BMA0216   | 0.24                                          | acyltransferase                                                | yes                  | yes                                   | 2488                       | 2942                    |                                                                                                                    |
| BPSL0739    | NA        | -0.6                                          | hypothetical protein                                           | no                   | no                                    | 1536                       | 1010                    |                                                                                                                    |
| BPSL0782-m2 | BMA0278   | 0.71                                          | putative type 4 fimbrial pilin protein                         | yes                  | yes                                   | 1571                       | 2573                    | <i>B. mallei</i> not known to make T4P                                                                             |
| BPSL0814    | BMA0315   | -0.2                                          | putative RND family acriflavine resistance protein A precursor | yes                  | yes                                   | 3530                       | 3070                    |                                                                                                                    |
| BPSL0881    | NA        | 0.7                                           | hypothetical protein                                           | no                   | no                                    | 1410                       | 2298                    |                                                                                                                    |
| BPSL0919    | BMA2228   | -1.63                                         | 4-hydroxy-3-methylbut-2-enyl diphosphate reductase             | yes                  | yes                                   | 6218                       | 2012                    |                                                                                                                    |
| BPSL0999-m3 | BMA0711   | 1.24                                          | putative OmpA family transmembrane protein                     | yes                  | yes                                   | 2316                       | 5487                    |                                                                                                                    |
| BPSL1021    | BMA0736   | -0.66                                         | inorganic pyrophosphatase                                      | yes                  | yes                                   | 1838                       | 1160                    |                                                                                                                    |
| BPSL1050    | BMA3016   | -1.64                                         | hypothetical protein                                           | yes                  | yes                                   | 5473                       | 1751                    |                                                                                                                    |
| BPSL1108    | BMA1926   | 0.59                                          | 3-carboxymuconate cyclase-like protein                         | yes                  | yes                                   | 1849                       | 2775                    |                                                                                                                    |
| BPSL1173    | BMA1874   | -0.11                                         | potassium-transporting ATPase c chain                          | yes                  | yes                                   | 2256                       | 2093                    |                                                                                                                    |
| BPSL1207    | BMA1834   | 0.65                                          | polyribonucleotide nucleotidyltransferase                      | yes                  | yes                                   | 656                        | 1029                    |                                                                                                                    |
| BPSL1317-m1 | PNC       | 0.04                                          | putative lipoprotein                                           | yes                  | PNC                                   | 2567                       | 2641                    | multiple long but partial DNA matches, no protein                                                                  |
| BPSL1317-m2 | PNC       | 0.58                                          | putative lipoprotein                                           | yes                  | PNC                                   | 1518                       | 2276                    | multiple long but partial DNA matches, no protein                                                                  |
| BPSL1431    | BMA1430   | -0.88                                         | putative esterase/lipase                                       | yes                  | yes                                   | 5938                       | 3236                    |                                                                                                                    |
| BPSL1445    | BMA1416   | 0.66                                          | putative lipoprotein                                           | yes                  | yes                                   | 2163                       | 3421                    |                                                                                                                    |
| BPSL1465    | BMA1397   | 0.42                                          | family C40 unassigned peptidase                                | yes                  | yes                                   | 4958                       | 6647                    | start codon discrepancy                                                                                            |
| BPSL1516    | BMA1342   | 0.45                                          | hypothetical protein BPSL1516                                  | yes                  | yes                                   | 2895                       | 3965                    |                                                                                                                    |
| BPSL1549    | PNC       | 0.23                                          | hypothetical protein BPSL1549                                  | yes                  | partial                               | 1345                       | 1576                    | nonsense codon 2/3 of the way through the gene.                                                                    |

|              |          |       |                                                          |     |     |      |       |                                                                                                              |
|--------------|----------|-------|----------------------------------------------------------|-----|-----|------|-------|--------------------------------------------------------------------------------------------------------------|
| BPSL1597     | PNC      | 0.29  | hypothetical protein BPSL1597                            | yes | PNC | 1390 | 1704  | entire <i>B. pseudomallei</i> gene matches <i>B. mallei</i> DNA sequence, gene not called                    |
| BPSL1600-m1  | BMA0988  | 0.28  | putative cytochrome c-related lipoprotein                | yes | yes | 1611 | 1952  |                                                                                                              |
| BPSL1606     | BMA0994  | 0.42  | putative copper-binding periplasmic protein              | yes | yes | 2149 | 2874  |                                                                                                              |
| BPSL1626     | PNC      | 0.75  | putative fimbrial subunit type 1 precursor               | yes | PNC | 1799 | 3030  | entire <i>B. pseudomallei</i> gene matches <i>B. mallei</i> DNA sequence, gene not called                    |
| BPSL1629     | BMA1024  | 0.26  | putative exported fimbria-related protein                | yes | yes | 2315 | 2772  | start codon discrepancy                                                                                      |
| BPSL1631-rr1 | BMA1027  | 0.89  | putative outer membrane protein                          | yes | yes | 2323 | 4303  | the carboxy half of the protein has a 2nd highly identical match                                             |
| BPSL1631-rr2 | BMA1027  | -0.01 | putative outer membrane protein                          | yes | yes | 1858 | 1850  | the carboxy half of the protein has a 2nd highly identical match                                             |
| BPSL1661-rr1 | NA       | 0.45  | putative hemolysin-related protein                       | no  | no  | 2366 | 3235  |                                                                                                              |
| BPSL1661-rr4 | NA       | 0.95  | putative hemolysin-related protein                       | no  | no  | 1486 | 2877  |                                                                                                              |
| BPSL1661s1   | NA       | 0.42  | putative hemolysin-related protein                       | no  | no  | 1689 | 2267  |                                                                                                              |
| BPSL1661s10  | NA       | 0.34  | putative hemolysin-related protein                       | no  | no  | 1842 | 2336  |                                                                                                              |
| BPSL1661s2   | NA       | 0.47  | putative hemolysin-related protein                       | no  | no  | 3450 | 4772  |                                                                                                              |
| BPSL1661s3   | NA       | 0.07  | putative hemolysin-related protein                       | no  | no  | 1661 | 1746  |                                                                                                              |
| BPSL1661s5   | NA       | 1.3   | putative hemolysin-related protein                       | no  | no  | 5295 | 13037 |                                                                                                              |
| BPSL1661-s6  | NA       | -0.02 | putative hemolysin-related protein                       | no  | no  | 3296 | 3246  |                                                                                                              |
| BPSL1661-s7  | NA       | 0.67  | putative hemolysin-related protein                       | no  | no  | 2771 | 4399  |                                                                                                              |
| BPSL1661-s8  | NA       | 1.57  | putative hemolysin-related protein                       | no  | no  | 677  | 2014  |                                                                                                              |
| BPSL1661-s9  | NA       | 0.83  | putative hemolysin-related protein                       | no  | no  | 885  | 1570  |                                                                                                              |
| BPSL1705-s1  | NA       | 0.85  | hypothetical protein BPSL1705                            | no  | no  | 835  | 1505  | very long partial match                                                                                      |
| BPSL1745     | BMA1147  | -0.91 | carbamate kinase                                         | yes | yes | 2760 | 1472  |                                                                                                              |
| BPSL1821-m2  | NA       | 0.84  | putative fimbriae assembly-related protein               | no  | no  | 1510 | 2696  |                                                                                                              |
| BPSL1889     | PNC      | 0.52  | putative lipoprotein                                     | yes | PNC | 1782 | 2561  | gene called in <i>B. mallei</i> SAVP1 but not <i>B. mallei</i> ATCC 23344, gene sequence present in both     |
| BPSL1900     | NA       | 0.33  | hypothetical protein BPSL1900                            | no  | no  | 1738 | 2186  |                                                                                                              |
| BPSL1901     | BMA1042  | 0.54  | hypothetical protein BPSL1901                            | yes | yes | 2795 | 4062  |                                                                                                              |
| BPSL1902     | BMA1043  | 0.95  | hypothetical protein BPSL1902                            | yes | yes | 2515 | 4859  |                                                                                                              |
| BPSL1913     | BMA1056  | 0.85  | RND efflux system outer membrane lipoprotein             | yes | yes | 2259 | 4067  |                                                                                                              |
| BPSL1925     | BMA1071† | 10.47 | hypothetical protein BPSL1925                            | yes | yes | 1    | 1420  | gene called in <i>B. mallei</i> SAVP1 but not <i>B. mallei</i> ATCC 23344, gene sequence present in both     |
| BPSL1937     | BMA1088  | 1.09  | lipoprotein                                              | yes | yes | 2874 | 6131  |                                                                                                              |
| BPSL1955     | BMA1108  | 0.35  | succinyl-CoA:3-ketoacid-coenzyme A transferase subunit A | yes | yes | 6645 | 8468  |                                                                                                              |
| BPSL2015-m2  | PNC      | 0.51  | putative membrane attached glycosyl hydrolase            | yes | PNC | 1503 | 2147  | gene called in <i>B. mallei</i> NCTC10229 but not <i>B. mallei</i> ATCC 23344, gene sequence present in both |
| BPSL2017-m1  | BMA0887  | 0.11  | Di-haem cytochrome c peroxidase                          | yes | yes | 2054 | 2221  | start codon discrepancy                                                                                      |
| BPSL2029     | PNC      | 0.18  | hypothetical protein BPSL2029                            | yes | PNC | 1769 | 1998  | gene called in <i>B. mallei</i> SAVP1 but not <i>B. mallei</i> , gene sequence present in both               |
| BPSL2030     | BMA0873  | -0.51 | hypothetical protein BPSL2030                            | yes | yes | 1821 | 1282  |                                                                                                              |

|              |          |       |                                                             |     |     |       |       |                                                           |
|--------------|----------|-------|-------------------------------------------------------------|-----|-----|-------|-------|-----------------------------------------------------------|
| BPSL2031     | BMA0872  | 0.6   | hypothetical protein BPSL2031                               | yes | yes | 1653  | 2514  |                                                           |
| BPSL2063     | BMA0840  | 0.74  | hemagglutinin related protein                               | yes | yes | 8462  | 14120 |                                                           |
| BPSL2096     | BMA1487  | 0.79  | putative hydroperoxide reductase                            | yes | yes | 1546  | 2679  |                                                           |
| BPSL2158     | BMA1554  | 0.07  | elongation factor Ts                                        | yes | yes | 1534  | 1614  |                                                           |
| BPSL2277     | BMA1696  | 0.12  | putative lipoprotein releasing system transmembrane protein | yes | yes | 2034  | 2215  |                                                           |
| BPSL2283     | BMA1702  | -0.07 | hypothetical protein BPSL2283                               | yes | yes | 4930  | 4696  |                                                           |
| BPSL2298     | BMA1716  | 0.28  | phasin-like protein                                         | yes | yes | 1430  | 1731  |                                                           |
| BPSL2499     | BMA0410  | 0.35  | electron transfer flavoprotein alpha-subunit                | yes | yes | 3141  | 4003  |                                                           |
| BPSL2504     | BMA0415  | -1.01 | putative hydrolase                                          | yes | yes | 6926  | 3433  | start codon discrepancy                                   |
| BPSL2520     | BMA0434  | 3.43  | hypothetical protein BPSL2520                               | yes | yes | 1954  | 21026 |                                                           |
| BPSL2522     | BMA0436  | 0.56  | outer membrane protein a precursor                          | yes | yes | 1567  | 2305  |                                                           |
| BPSL2559     | BMA2089  | 0.57  | outer membrane porin protein                                | yes | yes | 891   | 1325  | 3 additional near perfect matches                         |
| BPSL2615     | BMA2134  | 0.08  | ABC transporter, substrate binding component                | yes | yes | 2042  | 2161  |                                                           |
| BPSL2638     | BMA2160  | -0.32 | CrcB-family inner membrane protein                          | yes | yes | 2055  | 1642  |                                                           |
| BPSL2697     | BMA2001§ | 2.24  | chaperonin GroEL                                            | yes | yes | 7576  | 35823 |                                                           |
| BPSL2698     | BMA2002  | 1.63  | co-chaperonin GroES                                         | yes | yes | 1348  | 4173  |                                                           |
| BPSL2748     | BMA2066  | 0.1   | putative oxidoreductase                                     | yes | yes | 1563  | 1672  |                                                           |
| BPSL2752     | BMA2070  | -0.01 | putative fimbrial protein precursor                         | yes | yes | 1693  | 1681  | <i>B. mallei</i> not known to make T4P                    |
| BPSL2756     | BMA2073  | 1     | minor T4P pilin                                             | yes | yes | 875   | 1753  | <i>B. mallei</i> not known to make T4P                    |
| BPSL2765*-m2 | BMA2082  | -0.84 | putative OmpA family lipoprotein                            | yes | yes | 2922  | 1629  |                                                           |
| BPSL2765-m3  | BMA2082  | -0.02 | putative OmpA family lipoprotein                            | yes | yes | 4251  | 4197  |                                                           |
| BPSL2827     | BMA2326  | 0.53  | molecular chaperone DnaK                                    | yes | yes | 4799  | 6910  |                                                           |
| BPSL2919     | BMA2431  | 1.96  | 10 kDa chaperonin                                           | yes | yes | 1790  | 6943  |                                                           |
| BPSL3130     | BMA2705  | -1.01 | hypothetical protein BPSL3130                               | yes | yes | 10437 | 5167  |                                                           |
| BPSL3213     | BMA2632  | -0.76 | 50S ribosomal protein L3                                    | yes | yes | 8855  | 5220  |                                                           |
| BPSL3222     | BMA2642  | 2.11  | 50S ribosomal protein L7/L12                                | yes | yes | 1766  | 7640  |                                                           |
| BPSL3228     | BMA2649  | -0.75 | elongation factor Tu                                        | yes | yes | 1490  | 887   |                                                           |
| BPSL3247-m1  | BMA2591  | 0.3   | putative lipoprotein                                        | yes | yes | 3027  | 3730  | start codon discrepancy                                   |
| BPSL3319-m2  | BMA2873  | 0.08  | flagellin                                                   | yes | yes | 3583  | 3793  |                                                           |
| BPSL3336     | BMA2891  | 0.04  | curli production assembly/transport component CsgG          | yes | yes | 2485  | 2561  |                                                           |
| BPSL3341     | BMA2897  | -0.98 | hypothetical protein BPSL3341                               | yes | yes | 7382  | 3752  |                                                           |
| BPSL3396     | BMA2957  | 0.15  | ATP synthase subunit B                                      | yes | yes | 1479  | 1638  |                                                           |
| BPSL3398     | BMA2955  | 0.34  | ATP synthase subunit A                                      | yes | yes | 6118  | 7735  |                                                           |
| BPSS0065-m2  | BMAA0076 | 0.97  | hypothetical protein BPSS0065                               | yes | yes | 1365  | 2677  |                                                           |
| BPSS0088     | NA       | 0.37  | hypothetical protein BPSS0088                               | no  | no  | 4458  | 5757  |                                                           |
| BPSS0091     | NA       | 0.49  | fimbrial protein                                            | no  | no  | 1566  | 2206  |                                                           |
| BPSS0094     | NA       | -0.46 | fimbria subunit protein                                     | no  | no  | 1760  | 1283  | protein has some short conserved regions in other fimbria |
| BPSS0109-m2  | NA       | 0.15  | hypothetical protein BPSS0109                               | no  | no  | 3535  | 3927  |                                                           |
| BPSS0122     | NA       | 0.26  | hypothetical protein BPSS0122                               | no  | no  | 1882  | 2257  |                                                           |
| BPSS0123     | NA       | 0.08  | hypothetical protein BPSS0123                               | no  | no  | 1995  | 2107  |                                                           |
| BPSS0140     | NA       | 0.33  | sugar ABC transport system, lipoprotein                     | no  | no  | 1648  | 2070  |                                                           |

|               |                 |       |                                                             |          |          |      |       |                                                                                                          |
|---------------|-----------------|-------|-------------------------------------------------------------|----------|----------|------|-------|----------------------------------------------------------------------------------------------------------|
| BPSS0144-m2   | NA              | 0.74  | amylase                                                     | no       | no       | 1025 | 1712  |                                                                                                          |
| BPSS0212      | BMAA1864        | -0.46 | hypothetical protein BPSS0212                               | yes      | yes      | 3031 | 2197  |                                                                                                          |
| BPSS0226      | BMAA1847        | 0.6   | lipoprotein                                                 | yes      | yes      | 2003 | 3027  | protein matches almost exactly DNA does not                                                              |
| BPSS0252      | BMAA1817        | 0.41  | porin membrane protein                                      | yes      | yes      | 2065 | 2738  |                                                                                                          |
| BPSS0402      | NA              | 0.58  | bacteriophage/transposase fusion protein                    | no       | no       | 1993 | 2976  |                                                                                                          |
| BPSS0412      | NA              | -0.16 | hypothetical protein BPSS0412                               | no       | no       | 985  | 882   |                                                                                                          |
| BPSS0421      | NA              | 0.06  | lipopolysaccharide biosynthesis protein (O-antigen-related) | no       | no       | 1571 | 1641  |                                                                                                          |
| BPSS0455      | NA              | 0.53  | copper resistance-related lipoprotein                       | no       | no       | 1505 | 2172  |                                                                                                          |
| BPSS0467      | BMA1301         | 0.21  | putrescine ABC transport system, binding exported protein   | yes      | yes      | 1597 | 1852  | protein matches after amino terminus                                                                     |
| BPSS0476      | BMA2430/BMA2431 | 0.96  | co-chaperonin GroES                                         | partial  | yes      | 1218 | 2377  | protein split in half                                                                                    |
| BPSS0477      | BMAA2001§       | 2.08  | 60 kDa chaperonin                                           | yes      | yes      | 8725 | 36954 | protein matches, 5' end of gene does not                                                                 |
| BPSS0530      | PNC             | 0.49  | hypothetical protein BPSS0530                               | yes      | PNC      | 1303 | 1832  | gene called in <i>B. mallei</i> SAVP1 but not <i>B. mallei</i> ATCC 23344, gene sequence present in both |
| BPSS0542      | BMAA0465        | 0.14  | glycosyl hydrolase                                          | yes      | yes      | 2650 | 2916  |                                                                                                          |
| BPSS0564      | BMAA0488        | 0.52  | thermolysin metalloproteinase                               | yes      | yes      | 1336 | 1916  |                                                                                                          |
| BPSS0593      | NA              | 1.02  | iron-regulated membrane protein                             | no       | no       | 2000 | 4056  |                                                                                                          |
| BPSS0663      | NA              | 0.59  | hypothetical protein BPSS0663                               | no       | no       | 1258 | 1889  |                                                                                                          |
| BPSS0708      | BMAA1122        | 0.76  | porin protein                                               | yes      | yes      | 1588 | 2684  |                                                                                                          |
| BPSS0734-m2   | BMAA1932        | 0.61  | outer membrane efflux protein                               | yes      | yes      | 7401 | 11262 |                                                                                                          |
| BPSS0752-m1   | BMAA0593        | -0.16 | lipoprotein                                                 | yes      | yes      | 2113 | 1887  |                                                                                                          |
| BPSS0752-m2   | BMAA0593        | 0.43  | lipoprotein                                                 | yes      | yes      | 1677 | 2258  |                                                                                                          |
| BPSS0783-m1   | BMAA0633        | 0.73  | outer membrane porin protein                                | yes      | yes      | 1010 | 1680  |                                                                                                          |
| BPSS0783-m2   | BMAA0633        | 1.01  | outer membrane porin protein                                | yes      | yes      | 1172 | 2356  |                                                                                                          |
| BPSS0784      | BMAA0634        | 0.56  | hypothetical protein BPSS0784                               | yes      | yes      | 1650 | 2425  |                                                                                                          |
| BPSS0796-s1   | BMAA0649        | 0.07  | surface-exposed protein                                     | fragment | fragment | 1823 | 1908  | partial protein matches with BMAA0649                                                                    |
| BPSS0796-s2   | BMAA0649        | 0.07  | surface-exposed protein                                     | fragment | fragment | 1932 | 2026  | partial protein matches with BMAA0649                                                                    |
| BPSS0144-m2   | NA              | 0.74  | amylase                                                     | no       | no       | 1025 | 1712  |                                                                                                          |
| BPSS0796-s4   | BMAA0649        | 0.55  | surface-exposed protein                                     | fragment | fragment | 3440 | 5024  | partial protein matches with BMAA0649                                                                    |
| BPSS0839      | BMAA0708        | -0.02 | hypothetical protein BPSS0839                               | yes      | yes      | 1605 | 1587  |                                                                                                          |
| BPSS0879      | BMAA1353        | 0.67  | porin protein                                               | yes      | yes      | 781  | 1244  |                                                                                                          |
| BPSS0893      | BMAA1339        | 0.36  | porin protein                                               | yes      | yes      | 1587 | 2031  |                                                                                                          |
| BPSS0908      | BMAA1324        | 0.64  | surface-exposed protein                                     | yes      | yes      | 1321 | 2053  |                                                                                                          |
| BPSS0933      | BMAA1298        | 0.84  | methyl-accepting chemotaxis protein                         | yes      | yes      | 5793 | 10364 | protein matches after amino terminus                                                                     |
| BPSS0940      | BMAA1290        | 0.46  | ornithine cyclodeaminase                                    | yes      | yes      | 2040 | 2802  | <i>B. pseudomallei</i> has an 8 bp insert in the middle                                                  |
| BPSS0943-m2   | BMAA1286        | 1.09  | porin protein                                               | yes      | yes      | 488  | 1041  |                                                                                                          |
| BPSS0962-noss | BMAA1263        | 0.5   | extracellular serine protease precursor                     | yes      | yes      | 1717 | 2435  | DNA has some gaps, protein matches after amino terminus                                                  |
| BPSS1068      | NA              | 0.23  | hypothetical bacteriophage protein                          | no       | no       | 1827 | 2138  |                                                                                                          |

|             |               |       |                                                     |                             |                             |      |       |                                                                                                              |
|-------------|---------------|-------|-----------------------------------------------------|-----------------------------|-----------------------------|------|-------|--------------------------------------------------------------------------------------------------------------|
| BPSS1199    | NA            | 0.18  | hypothetical protein BPSS1199                       | no                          | no                          | 1783 | 2022  |                                                                                                              |
| BPSS1337    | BMAA0939      | 0.43  | hypothetical protein BPSS1337                       | yes                         | yes                         | 1783 | 2400  | start codon discrepancy                                                                                      |
| BPSS1382-m2 | NA            | 0.13  | Endonuclease/Exonuclease/phosphatase family protein | no                          | no                          | 5084 | 5557  |                                                                                                              |
| BPSS1385-m3 | NA            | 0.67  | ATP/GTP binding protein                             | no                          | no                          | 2370 | 3767  |                                                                                                              |
| BPSS1390    | BMAA1602      | 1.07  | type III secretion system protein                   | yes                         | yes                         | 1085 | 2283  | better match to BPSS1592, both are E=0, BMAA1544 also related                                                |
| BPSS1394-m3 | BMAA1637      | 0.9   | type III secretion system ATPase                    | yes                         | yes                         | 1311 | 2452  | protein matches after amino terminus, similar match to another T3S system ATPase                             |
| BPSS1401-m1 | BMAA1630‡     | 10.41 | type III secretion-associated protein               | high identity match present | high identity match present | 1    | 1359  |                                                                                                              |
| BPSS1406    | NA            | -0.07 | hypothetical protein BPSS1406                       | no                          | no                          | 2332 | 2218  |                                                                                                              |
| BPSS1434-s1 | NA            | 0.81  | membrane-anchored cell surface protein              | no                          | high identity match present | 1379 | 2418  | protein and gene are highly repetitive, high identity of BPSS1439/BMAA0810                                   |
| BPSS1434-s3 | NA            | 0.8   | membrane-anchored cell surface protein              | no                          | high identity match present | 1907 | 3312  | protein and gene are highly repetitive, high identity of BPSS1439/BMAA0810                                   |
| BPSS1434-s5 | NA            | 0.19  | membrane-anchored cell surface protein              | no                          | high identity match present | 3114 | 3554  | protein and gene are highly repetitive, high identity of BPSS1439/BMAA0810                                   |
| BPSS1434-s7 | NA            | -0.25 | membrane-anchored cell surface protein              | no                          | high identity match present | 2588 | 2181  | protein and gene are highly repetitive, high identity of BPSS1439/BMAA0810                                   |
| BPSS1439-s1 | BMAA0810      | 0.64  | membrane-anchored cell surface protein              | yes                         | yes                         | 1315 | 2052  |                                                                                                              |
| BPSS1439-s5 | BMAA0810      | 0.41  | membrane-anchored cell surface protein              | yes                         | yes                         | 1530 | 2028  |                                                                                                              |
| BPSS1492    | BMAA0749      | -0.03 | hemagglutinin related protein                       | yes                         | yes                         | 3649 | 3579  |                                                                                                              |
| BPSS1512-m2 | BMAA0729      | 0.18  | secreted TssM deubiquitinase                        | yes                         | yes                         | 4421 | 4993  |                                                                                                              |
| BPSS1516-m1 | BMAA1514P NC* | -0.35 | hypothetical protein BPSS1516                       | partial                     | partial                     | 3314 | 2592  | first half of DNA matches, no protein called                                                                 |
| BPSS1525-m3 | BMAA1523      | 0.83  | G-nucleotide exchange factor                        | yes                         | yes                         | 1017 | 1812  |                                                                                                              |
| BPSS1530    | BMAA1528      | 0.28  | HNS-like regulatory protein                         | yes                         | yes                         | 1475 | 1788  |                                                                                                              |
| BPSS1531    | BMAA1529      | 0.83  | type III secretion system cell invasion protein     | yes                         | yes                         | 3818 | 6769  |                                                                                                              |
| BPSS1532-m1 | BMAA1530      | 1.01  | type III secretion system cell invasion protein     | yes                         | yes                         | 9215 | 18596 |                                                                                                              |
| BPSS1532-m2 | BMAA1530      | 0.96  | type III secretion system cell invasion protein     | yes                         | yes                         | 9185 | 17858 |                                                                                                              |
| BPSS1534    | BMAA1532      | 1.03  | type III secretion protein                          | yes                         | yes                         | 2492 | 5099  |                                                                                                              |
| BPSS1535    | BMAA1533      | 0.59  | surface presentation of antigens protein            | yes                         | yes                         | 945  | 1422  |                                                                                                              |
| BPSS1544-m2 | BMAA1543      | 0.69  | Type III secretion system protein                   | yes                         | yes                         | 2468 | 3974  |                                                                                                              |
| BPSS1545-m1 | BMAA1544      | -0.18 | Type III secretion system protein                   | yes                         | yes                         | 2277 | 2007  | <i>B. mallei</i> has 15 bp insert towards the 5' end of gene, start codon issue                              |
| BPSS1546    | BMAA1545      | 0.51  | AraC-family regulator of type III secretion system  | yes                         | yes                         | 1415 | 2022  |                                                                                                              |
| BPSS1547-m1 | BMAA1547      | -0.87 | type III secretion system protein                   | yes                         | yes                         | 5929 | 3246  |                                                                                                              |
| BPSS1588-m3 | BMAA1597.1    | 0.63  | hypothetical protein BPSS1588                       | yes                         | yes                         | 934  | 1449  | amino terminus of protein doesn't match                                                                      |
| BPSS1591    | PNC           | 0.18  | hypothetical protein BPSS1591                       | yes                         | PNC                         | 1345 | 1528  | gene called in <i>B. mallei</i> NCTC10229 but not <i>B. mallei</i> ATCC 23344, gene sequence present in both |

|             |           |       |                                                     |              |              |       |       |                                                         |
|-------------|-----------|-------|-----------------------------------------------------|--------------|--------------|-------|-------|---------------------------------------------------------|
| BPSS1594    | BMAA1604  | 0.5   | hypothetical protein BPSS1594                       | yes          | yes          | 1282  | 1807  | amino terminus of protein doesn't match                 |
| BPSS1599    | BMAA1609  | 0.97  | type 4 pilus biosynthesis protein                   | yes          | yes          | 1179  | 2313  |                                                         |
| BPSS1600-m1 | BMAA1610  | 0.2   | type 4 pilus biosynthesis protein                   | yes          | yes          | 2745  | 3163  |                                                         |
| BPSS1610-m2 | BMAA1621  | 0.15  | AraC-family transcriptional regulator               | yes          | yes          | 2567  | 2847  | 12 bp insert in <i>B. pseudomallei</i>                  |
| BPSS1617    | BMAA1628  | 0.38  | type III secretion protein                          | yes          | yes          | 2091  | 2718  |                                                         |
| BPSS1620-m1 | BMAA1630† | 3.28  | type III secretion protein                          | yes          | yes          | 148   | 1441  |                                                         |
| BPSS1624    | BMAA1550  | -0.47 | type III secretion protein                          | yes          | yes          | 2652  | 1921  | protein matches after amino terminus                    |
| BPSS1649    | BMAA1664  | 0.84  | sugar-binding protein                               | yes          | yes          | 896   | 1608  |                                                         |
| BPSS1652    | BMAA1667  | 0.32  | patatin-like protein                                | yes          | yes          | 2172  | 2711  |                                                         |
| BPSS1679    | BMAA1698  | 0.49  | porin related exported protein                      | yes          | yes          | 563   | 788   | DNA has some gaps, protein matches after amino terminus |
| BPSS1722    | BMAA1751  | 0.81  | malate dehydrogenase                                | yes          | yes          | 1711  | 2998  |                                                         |
| BPSS1727    | BMAA1756  | 0.47  | hemagglutinin related protein                       | yes          | yes          | 1589  | 2199  |                                                         |
| BPSS1742    | BMAA0427  | 0     | outer membrane copper receptor                      | yes          | yes          | 2912  | 2902  |                                                         |
| BPSS1743    | BMAA0426  | -0.1  | hypothetical protein BPSS1743                       | yes          | yes          | 2117  | 1974  |                                                         |
| BPSS1778    | BMAA0308  | -0.22 | hypothetical protein BPSS1778                       | yes          | yes          | 1829  | 1568  | DNA is fragmented but protein matches                   |
| BPSS1845-m1 | BMAA0259  | -0.14 | endonuclease/exonuclease/phosphatase family protein | yes          | yes          | 2647  | 2408  |                                                         |
| BPSS1850    | BMAA0251  | 0.23  | hypothetical protein BPSS1850                       | yes          | yes          | 1664  | 1957  | DNA is fragmented but protein matches                   |
| BPSS1974-m2 | BMAA0090  | 0.24  | lipoprotein                                         | yes          | yes          | 1669  | 1968  |                                                         |
| BPSS1993-m1 | BMAA1248  | 0.18  | serine metalloprotease precursor                    | yes/fragment | yes/fragment | 2479  | 2805  | DNA and protein are both fragments with exact matches   |
| BPSS1998-m1 | NA        | 5.81  | lipoprotein                                         | no           | no           | 27    | 1514  |                                                         |
| BPSS2013    | NA        | 0.6   | hypothetical protein BPSS2013                       | no           | no           | 1620  | 2451  |                                                         |
| BPSS2043    | NA        | -0.84 | hypothetical protein BPSS2043                       | no           | no           | 6351  | 3538  |                                                         |
| BPSS2052    | NA        | 0.51  | activator/secretion protein                         | no           | no           | 1274  | 1809  |                                                         |
| BPSS2053-s1 | NA        | 0.44  | cell surface protein                                | no           | no           | 1194  | 1618  |                                                         |
| BPSS2053-s2 | NA        | 0.12  | cell surface protein                                | no           | no           | 2884  | 3136  |                                                         |
| BPSS2053-s3 | NA        | 0.26  | cell surface protein                                | no           | no           | 4255  | 5087  |                                                         |
| BPSS2053-s4 | NA        | 0.42  | cell surface protein                                | no           | no           | 10737 | 14392 |                                                         |
| BPSS2053-s5 | NA        | -0.57 | cell surface protein                                | no           | no           | 2837  | 1913  |                                                         |
| BPSS2053-s6 | NA        | 0.37  | cell surface protein                                | no           | no           | 4966  | 6411  |                                                         |
| BPSS2053-s7 | NA        | 0.48  | cell surface protein                                | no           | no           | 2038  | 2840  |                                                         |
| BPSS2053-s8 | NA        | 0.15  | cell surface protein                                | no           | no           | 9213  | 10215 |                                                         |
| BPSS2053-s9 | NA        | 0.34  | cell surface protein                                | no           | no           | 11343 | 14400 |                                                         |
| BPSS2136-m1 | BMAA0356  | 1.15  | family S43 non-peptidase homologue                  | yes          | yes          | 1134  | 2516  |                                                         |
| BPSS2141    | BMAA0351  | 0.99  | periplasmic oligopeptide-binding protein precursor  | yes          | yes          | 2053  | 4065  |                                                         |
| BPSS2145    | BMAA0346  | 0.75  | hypothetical protein BPSS2145                       | yes          | yes          | 1626  | 2742  |                                                         |
| BPSS2160    | BMAA1952  | 0.83  | outer membrane porin protein                        | yes          | yes          | 1282  | 2282  |                                                         |
| BPSS2185    | NA        | 0.11  | pilus subunit protein                               | no           | no           | 1961  | 2118  |                                                         |
| BPSS2186    | NA        | -0.12 | pilus subunit protein                               | no           | no           | 2327  | 2147  |                                                         |
| BPSS2192    | NA        | -0.01 | hypothetical protein BPSS2192                       | no           | no           | 1849  | 1835  |                                                         |

|          |          |       |                                       |     |     |      |      |                                                         |
|----------|----------|-------|---------------------------------------|-----|-----|------|------|---------------------------------------------------------|
| BPSS2193 | NA       | 0.24  | hypothetical protein BPSS2193         | no  | no  | 1870 | 2207 |                                                         |
| BPSS2194 | NA       | 0.67  | hypothetical protein BPSS2194         | no  | no  | 1735 | 2753 |                                                         |
| BPSS2277 | BMAA2021 | -0.11 | hypothetical protein BPSS2277         | yes | yes | 1573 | 1457 |                                                         |
| BPSS2288 | BMAA2035 | 0.26  | HSP20/alpha crystallin family protein | yes | yes | 3356 | 4032 |                                                         |
| BPSS2289 | BMAA2036 | 0.63  | porin protein                         | yes | yes | 1617 | 2506 |                                                         |
| BPSS2331 | BMAA2092 | 0.47  | lipoprotein                           | yes | yes | 2740 | 3784 | DNA has some gaps, protein matches after amino terminus |

\* PNC = protein not called in the *B. mallei* ATCC 23344 genome. NA = gene is absent from *B. mallei* ATCC 23344 genome. No = protein and gene are absent from *B. mallei* ATCC 23344 genome.

† DNA between BMA1070 and BMA1072 is 99% identical to BPSL1925 but gene not called.

‡ BMAA1630 corresponds to BPSS1620, cross-reaction possible due to very high identity to BPSS1401

§ BMA2001 corresponds to BPSL2697, cross-reaction due to very high identity to BPSS0477

¶ Comments on the protein or gene similarity or nature of the protein in *B. mallei*.
